# Supplementary material for: Advances in CALIPSO (IIR) cirrus cloud property retrievals – Part 1: Methods and testing
Source: Copernicus journal article supplement (doi:10.5194/egusphere-2024-3790), 2024-12-12
Supplement: Supplementary file 1 [file egusphere-2024-3790-supplement.pdf]

# **Advances in CALIPSO (IIR) cirrus cloud property retrievals – Part 1: Methods and testing**

David L. Mitchell<sup>1</sup>, Anne Garnier<sup>2</sup>, and Sarah Woods<sup>3</sup>

<sup>1</sup> Desert Research Institute, Reno, NV 89512-1095, USA

<sup>2</sup>[RSES]Analytical Mechanics Associates, Hampton, VA 23666, USA

<sup>3</sup> NSF NCAR, Boulder, CO 80301, USA

*Correspondence to:* David L. Mitchell (David.Mitchell@dri.edu)

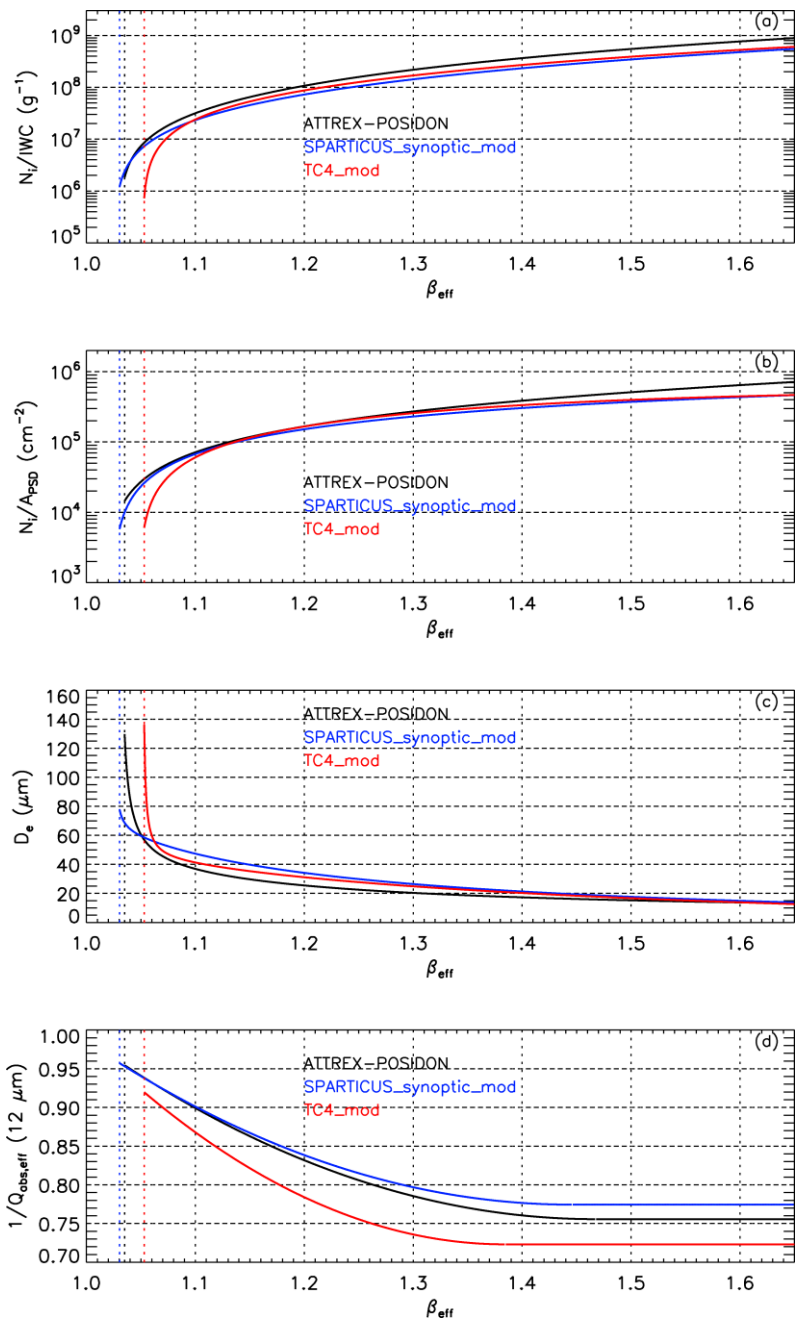

Figure S1: same as Fig. 14 but showing the curve fits only.

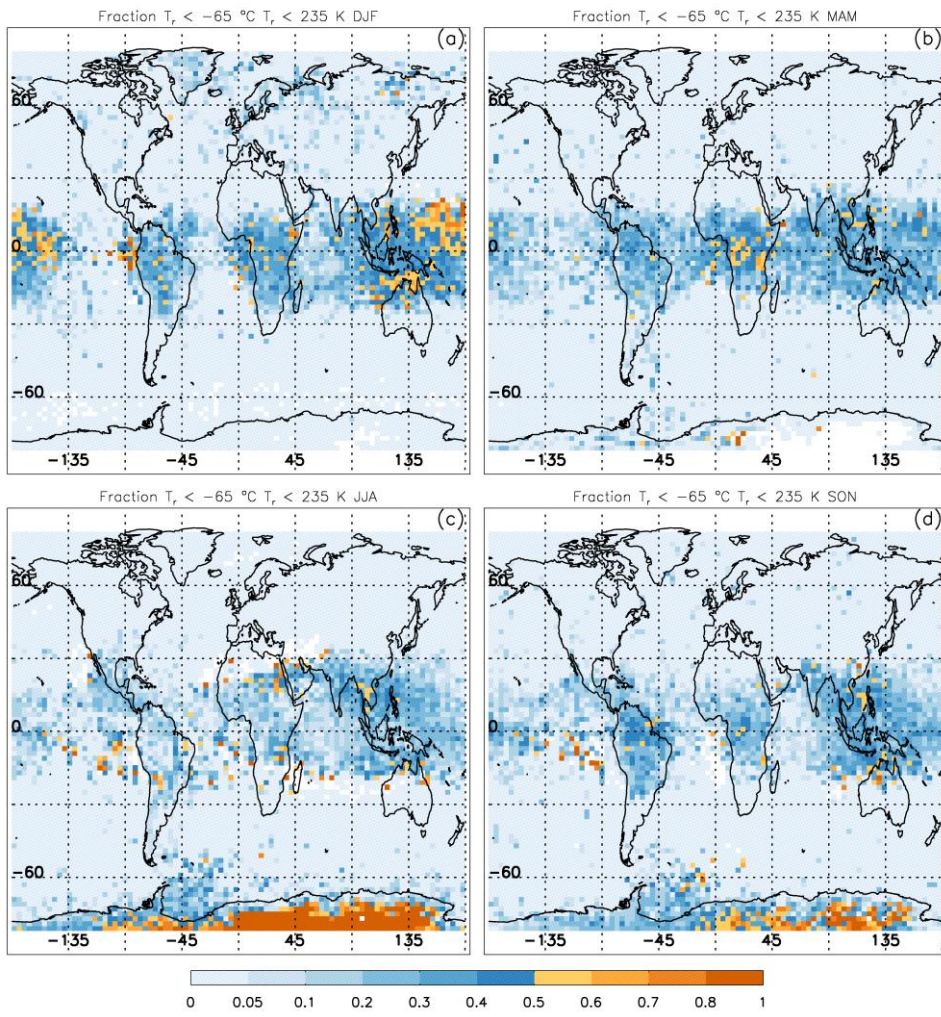

Figure S2: Same as Fig. 16 but for cirrus clouds having  $\sim 0.3 < \tau < \sim 3$ , over oceans and land.

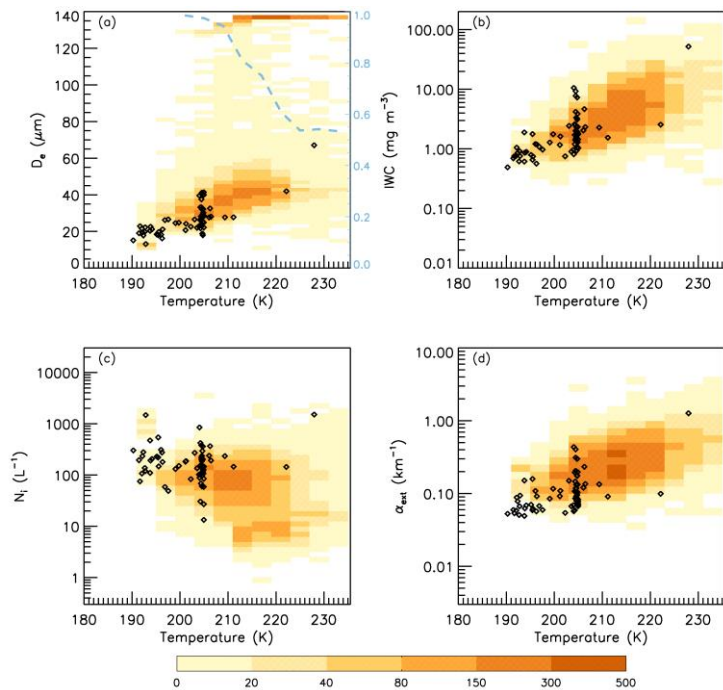

**Figure S3:** Same as Fig. 17 (ATTREX) but where  $\sim 0.3 < \tau < \sim 3$

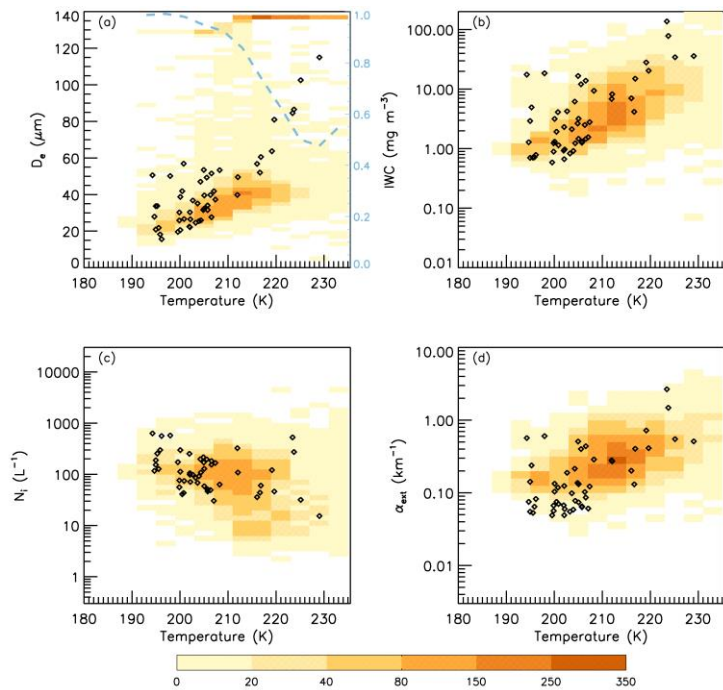

**Figure S4:** Same as Fig. 18 (POSIDON) but where  $\sim 0.3 < \tau < \sim 3$

Table S1: Same as Table 6 but for the POSIDON campaign.

| <b>POSIDON</b>                                  | $\sim 0.2 - 0.3 < \tau < \sim 3$ |       |       | $\sim 0.01 < \tau < \sim 3$ |       |        |
|-------------------------------------------------|----------------------------------|-------|-------|-----------------------------|-------|--------|
| $T_r$ (K)                                       | 193                              | 213   | 233   | 193                         | 213   | 233    |
| Pixel count                                     | 151                              | 1448  | 188   | 2107                        | 2366  | 350    |
| $\tau_{\text{abs}}(12.05 \mu\text{m})$          | 0.17                             | 0.39  | 0.58  | 0.04                        | 0.26  | 0.28   |
| $\Delta\tau_{\text{abs}}(12.05 \mu\text{m})$    | 0.017                            | 0.020 | 0.029 | 0.016                       | 0.019 | 0.023  |
| $\tau$                                          | 0.27                             | 0.69  | 1.04  | 0.06                        | 0.45  | 0.49   |
| $\Delta\tau$                                    | 0.033                            | 0.041 | 0.053 | 0.032                       | 0.040 | 0.046  |
| $\beta_{\text{eff}}$                            | 1.241                            | 1.088 | 1.060 | 1.200                       | 1.087 | 1.050  |
| $\Delta\beta_{\text{eff}}$                      | 0.07                             | 0.03  | 0.03  | 0.30                        | 0.04  | 0.05   |
| $\alpha_{\text{vis}} (\text{km}^{-1})$          | 0.16                             | 0.29  | 0.60  | 0.05                        | 0.20  | 0.29   |
| $\Delta\alpha_{\text{vis}}/\alpha_{\text{vis}}$ | 0.11                             | 0.06  | 0.06  | 0.52                        | 0.09  | 0.10   |
| $D_e$ ( $\mu\text{m}$ )                         | 23                               | 43    | 61    | 25                          | 43    | 136    |
| $\Delta D_e/D_e$                                | 0.16                             | 0.15  | 1.73  | 0.97                        | 0.33  | >3.00  |
| IWC ( $\text{mg m}^{-3}$ )                      | 1.0                              | 4.6   | 11.5  | 0.5                         | 3.4   | 6.9    |
| $\Delta\text{IWC}/\text{IWC}$                   | 0.25                             | 0.21  | 1.70  | 1.45                        | 0.44  | >3.00  |
| $N_i$ ( $\text{L}^{-1}$ )                       | 158                              | 66    | 43    | 46                          | 44    | 28     |
| $\Delta N_i/N_i$ ( $\text{L}^{-1}$ )            | 0.30                             | 0.65  | 2.73  | 1.87                        | 1.22  | > 3.00 |
